# Supplementary material for: Evaluation of a Luminometric Cell Counting System in Context of Antimicrobial Photodynamic Inactivation
Source: MDPI journal article supplement (doi:10.3390/microorganisms10050950), 2022-04-30
Supplement: s1 [file s1]

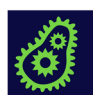

## Supplemental materials

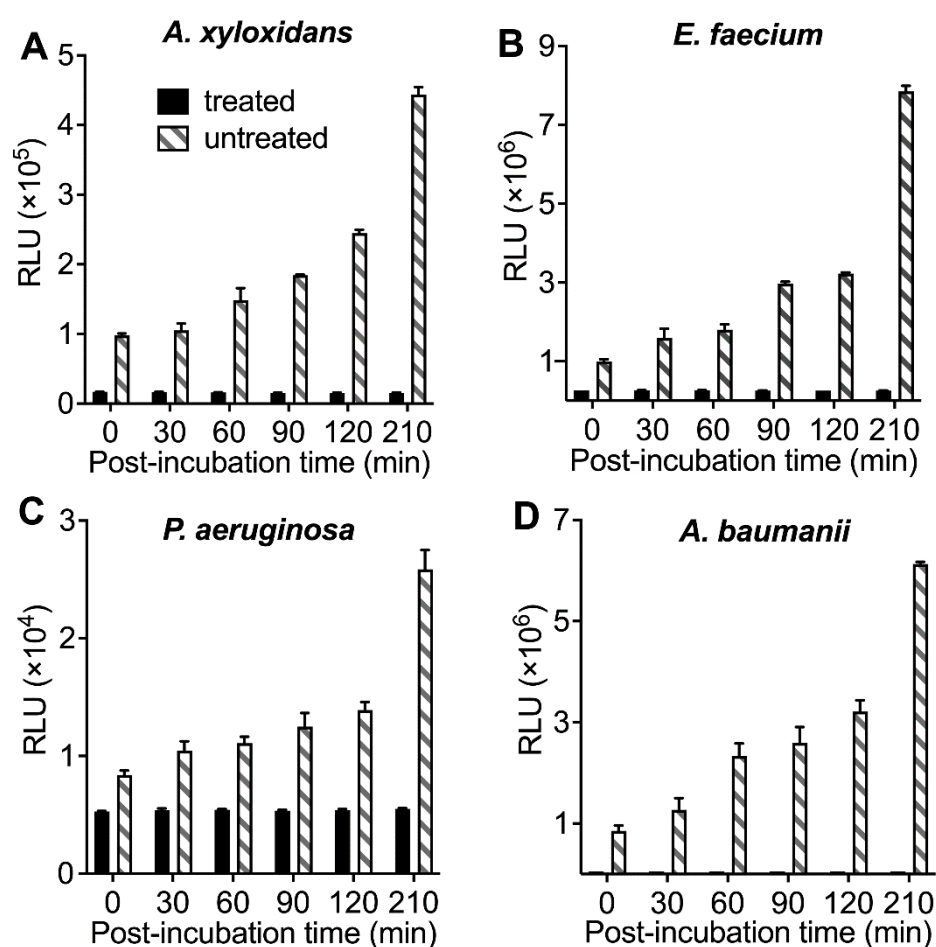

**Figure S1. Luminescence of heat-inactivated bacteria compared to active bacteria, dependent on post-incubation time.** Bacteria suspended in 50 % BHI broad medium were heat-inactivated or left untreated and incubated at 37 °C, 5% CO<sub>2</sub>. The ATP-evoked luminescence was measured on bacterial lysates with the cell viability assay at the indicated timepoints in (A) XDR *Achromobacter xylosoxidans*, (B) VRE *Enterococcus faecium*, (C) MDR *Pseudomonas aeruginosa* and (D) XDR *Actinetobacter baumannii* ( $n = 3$  each).

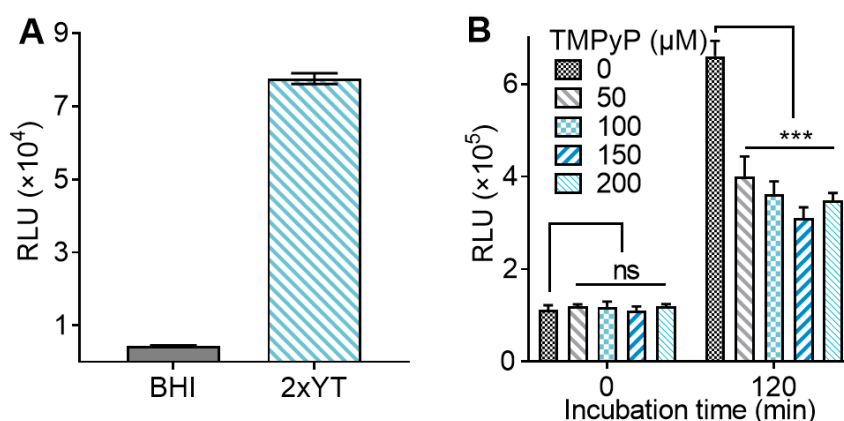

**Figure S2. Background luminescence of bacteria growth media and VRE *E. faecium* susceptibility to TMPyP without illumination** (A) Background luminescence varies between bacterial growth media. The BHI growth medium has a 17 times lower luminescence compared to 2xYT growth medium, when measured without photosensitizer ( $n = 8$ ). (B) ATP-induced luminescence in VRE *E. faecium* after 0 min and 120 min incubation with TMPyP without illumination at 37 °C, 5%  $\text{CO}_2$  (\*\* $p < 0.001$ , two-way ANOVA and Bonferroni correction,  $n = 3$ ).

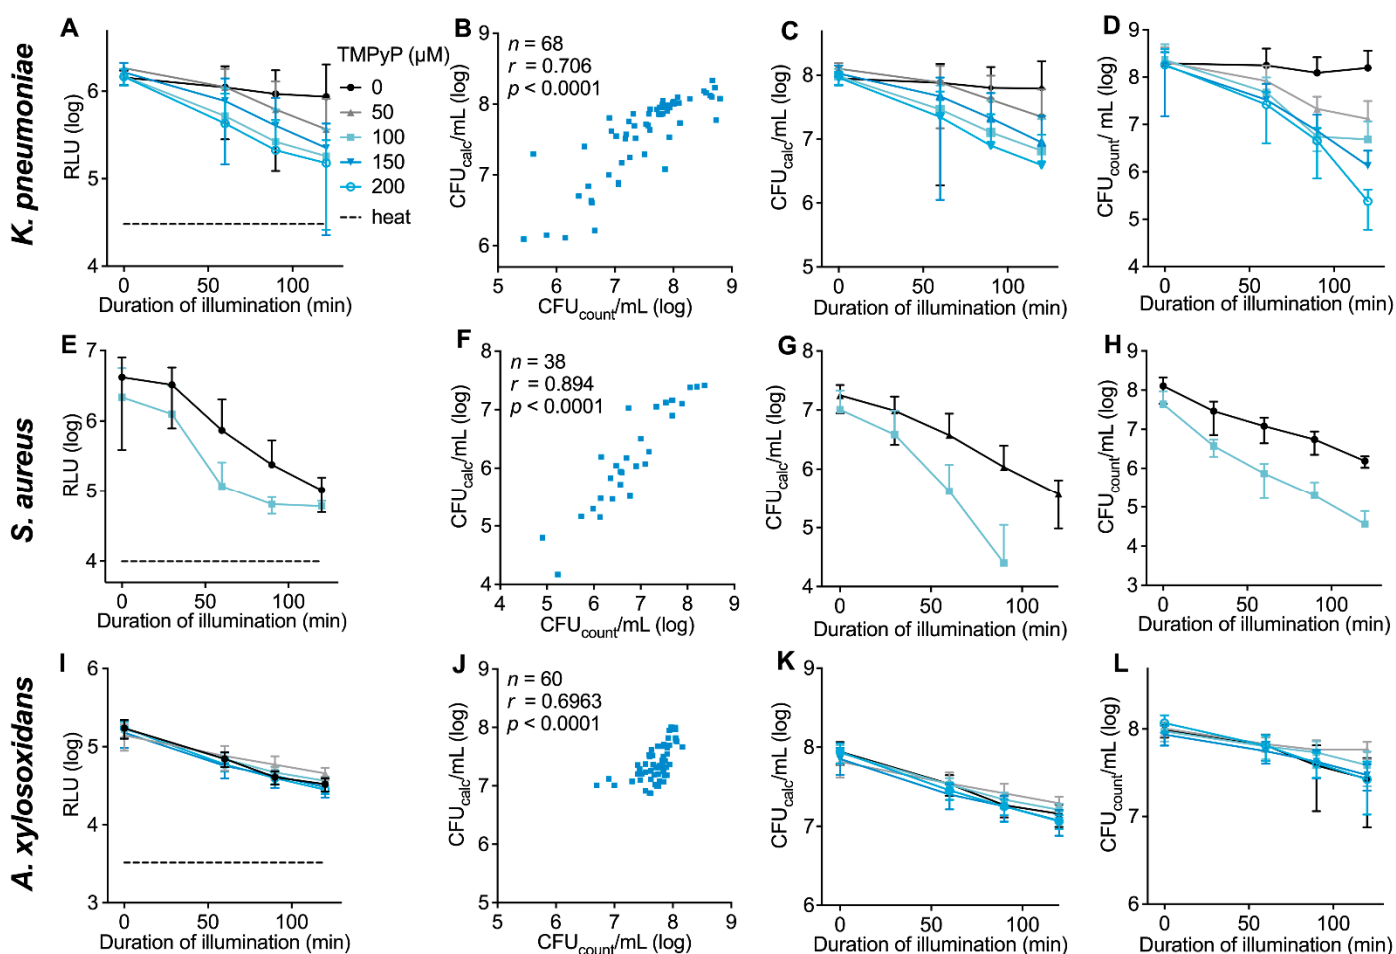

**Figure S3. Further evaluation of PDI effects of TMPyP on different bacterial strain as determined by ATP-evoked luminescence and manual counting of bacteria colonies.** Data from PDI experiments are presented. TMPyP was illuminated with 13 mW/cm<sup>2</sup> results in 0 J/cm<sup>2</sup> (0 min) 46.8 J/cm<sup>2</sup> (60 min), 70.2 J/cm<sup>2</sup> (90 min), 93.6 J/cm<sup>2</sup> (120 min) at  $\lambda_{\text{cent}} = 420$  nm, dashed line shows the luminescence of heat-inactivated bacteria. (A) ATP-induced luminescence by CRE *K. pneumoniae*

after PDI. **(B)** Correlation between calculated ( $CFU_{calc}$ ) and manually determined bacterial density ( $CFU_{count}$ ) in CRE *K. pneumoniae*;  $r$  = correlation coefficient. **(C)**  $CFU_{calc}$  of CRE *K. pneumoniae* based on luminometric measurements. **(D)**  $CFU_{count}$  of CRE *K. pneumoniae* after PDI. **(E–H)** Results for MRSA *S. aureus* as described above for *K. pneumoniae*. **(I–L)** Results for XDR *A. xylosoxidans* as described above for *K. pneumoniae*.
